# Supplementary material for: Plant-Based Dairy Alternatives Contribute to a Healthy and Sustainable Diet
Source: MDPI journal article supplement (doi:10.3390/nu15153393), 2023-07-30
Supplement: s1 [file s1]

## Identifying Ingredient Sources for PBD

It was assumed that all PBDs consumed in the EU are also produced in European countries. It was challenging to retrieve trade data for PBDAs on a European scale to account for the grains and legumes grown outside of Europe that were processed for the PBDA market. However, with a small percentage of the vegan population in Europe in 2020 (3.2%) who are most likely to consume PBDAs, it is fair to assume that EU crops were used. Many PBDAs highlight on their packaging that a European crop was processed with locally sourced produce, assumed to be more sustainable.

### Comparative Analysis of the Cost of Soya Drinks and Dairy Milk in the UK.

[illegible]
